# Supplementary material for: Global atmospheric inversion of the anthropogenic NH 3 emissions over 2019–2022 using the LMDZ-INCA chemistry transport model and the IASI NH 3 observations
Source: Copernicus journal article supplement (doi:10.5194/acp-25-12379-2025), 2025-10-08
Supplement: Supplementary file 1 [file acp-25-12379-2025-supplement.pdf]

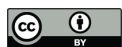

*Supplement of*

**Global atmospheric inversion of the anthropogenic NH<sub>3</sub> emissions over 2019–2022 using the LMDZ-INCA chemistry transport model and the IASI NH<sub>3</sub> observations**

**Pramod Kumar et al.**

*Correspondence to:* Pramod Kumar ([pramod.kumar@lsce.ipsl.fr](mailto:pramod.kumar@lsce.ipsl.fr))

The copyright of individual parts of the supplement might differ from the article licence.

## List of Figures

|        |                                                                                                                                                                                                                                                                                                                                                                                                                                                                                                                                                                                                                                                                                                                                                                                                                                                                                                                                                               |    |
|--------|---------------------------------------------------------------------------------------------------------------------------------------------------------------------------------------------------------------------------------------------------------------------------------------------------------------------------------------------------------------------------------------------------------------------------------------------------------------------------------------------------------------------------------------------------------------------------------------------------------------------------------------------------------------------------------------------------------------------------------------------------------------------------------------------------------------------------------------------------------------------------------------------------------------------------------------------------------------|----|
| S1     | Global daily emissions (2019-2022) of (a) NH <sub>3</sub> , (b) NO <sub>x</sub> (as NO), and (c) SO <sub>2</sub> from the prior CEDS anthropogenic and natural sources over the land. . . . .                                                                                                                                                                                                                                                                                                                                                                                                                                                                                                                                                                                                                                                                                                                                                                 | 2  |
| S2     | Spatial distribution of monthly mean $\beta$ for July 2019. . . . .                                                                                                                                                                                                                                                                                                                                                                                                                                                                                                                                                                                                                                                                                                                                                                                                                                                                                           | 3  |
| 5 S3   | The boundaries of the 10 regions over the main land defined by ? (based on the IPCC reference regions described in ? used to gap filling the unconstrained emissions in this study. . . . .                                                                                                                                                                                                                                                                                                                                                                                                                                                                                                                                                                                                                                                                                                                                                                   | 4  |
| S4     | IASI-constrained (lower stack bars) and gap-filled (upper stack bars) percentage (%) of seasonal total NH <sub>3</sub> emissions across six regions over the land from 2019 to 2022. . . . .                                                                                                                                                                                                                                                                                                                                                                                                                                                                                                                                                                                                                                                                                                                                                                  | 5  |
| S5     | Seasonal NH <sub>3</sub> emissions (IASI-constrained (lower stack bars) and gap-filled (upper stack bars)) across six regions over the land from 2019 to 2022. . . . .                                                                                                                                                                                                                                                                                                                                                                                                                                                                                                                                                                                                                                                                                                                                                                                        | 6  |
| 10 S6  | The regions selected for the regional analysis. . . . .                                                                                                                                                                                                                                                                                                                                                                                                                                                                                                                                                                                                                                                                                                                                                                                                                                                                                                       | 7  |
| S7     | The spatial distributions of the annual mean NH <sub>3</sub> total columns for all four years from 2019 to 2022. The first and second columns in each row show annual mean from IASI ANNI-NH3-v4 observations ( $\Omega_{obs}$ ) and LMDZ-INCA model simulated columns after applying the averaging kernel ( $\Omega_{mod}$ ), respectively. The third column's figures show the differences $\Omega_{mod} - \Omega_{obs}$ between. The last column figures show the scatter density plots between the observed IASI and the LMDZ-INCA model NH <sub>3</sub> columns. In the scatter plots, the solid blue line represents the one-to-one line, while the dashed red line represents the regression line. . . . .                                                                                                                                                                                                                                             | 8  |
| 15 S8  | Comparison of the (a) annually, and (b) monthly averages of the IASI NH <sub>3</sub> column observations ( $\Omega_{obs}$ ) over the model horizontal land grid cells at $1.27^\circ \times 2.5^\circ$ resolution to the corresponding simulations of average columns with LMDZ-INCA ( $\Omega_{mod}$ ) using the IASI-constrained NH <sub>3</sub> emission estimates derived from our global inversions and using the prior CEDS NH <sub>3</sub> emissions over the globe and the year 2019. It also shows the correlation coefficient ( $r$ ) and root mean square error (RMSE), and Fractional Bias (FB) from this comparison. The black line denotes the one-to-one line. . . . .                                                                                                                                                                                                                                                                         | 9  |
| 20 S9  | Comparison of the monthly averages of the IASI NH <sub>3</sub> total column observations ( $\Omega_{obs}$ ) over the model horizontal land grid cells at $1.27^\circ \times 2.5^\circ$ resolution to the corresponding averages of the simulation of these observations with LMDZ-INCA model ( $\Omega_{mod}$ ) over different regions for the year 2019. Each panel shows the correlation coefficient ( $r$ ), root mean square error (RMSE), and fractional bias (FB) between modeled (from both prior and IASI-constrained estimated NH <sub>3</sub> emissions from inversions) and observed IASI NH <sub>3</sub> columns. The left column in each panel displays results using prior CEDS NH <sub>3</sub> emissions, while the right column displays results using the estimated NH <sub>3</sub> emissions derived from our global inversions. The red dashed line represents the linear regression fit, and the black line denotes the 1:1 line. . . . . | 10 |
| 25 S10 | Spatial distribution of the total annual NH <sub>3</sub> emissions for a period of four years from 2019 to 2022, showing the bottom-up prior CEDS emissions (first column), and IASI-constrained emissions (second column). . . . .                                                                                                                                                                                                                                                                                                                                                                                                                                                                                                                                                                                                                                                                                                                           | 11 |
| 30 S11 | Yearly number of fires and burned area across the three regions (a) South America, (b) Africa, and (c) North America for the years from 2019 to 2022 (source: <a href="https://gwis.jrc.ec.europa.eu/">https://gwis.jrc.ec.europa.eu/</a> , last access: 02-09-2024). . . . .                                                                                                                                                                                                                                                                                                                                                                                                                                                                                                                                                                                                                                                                                 | 12 |
| 35 S12 | NH <sub>3</sub> Emissions over the Middle East region. First row shows the spatial distribution of the total annual emissions averaged over four-year period (2019-2022), showing (a1) the bottom-up prior CEDS emissions (first column), (a2) IASI-constrained emissions ( $E_{IASI}$ ). Figure (b) shows the daily variation of the estimate NH <sub>3</sub> emissions for all four years and (c) shows the annual estimated, prior CEDS, and other bottom-up inventories emissions. . . . .                                                                                                                                                                                                                                                                                                                                                                                                                                                                | 13 |
| 40     |                                                                                                                                                                                                                                                                                                                                                                                                                                                                                                                                                                                                                                                                                                                                                                                                                                                                                                                                                               |    |

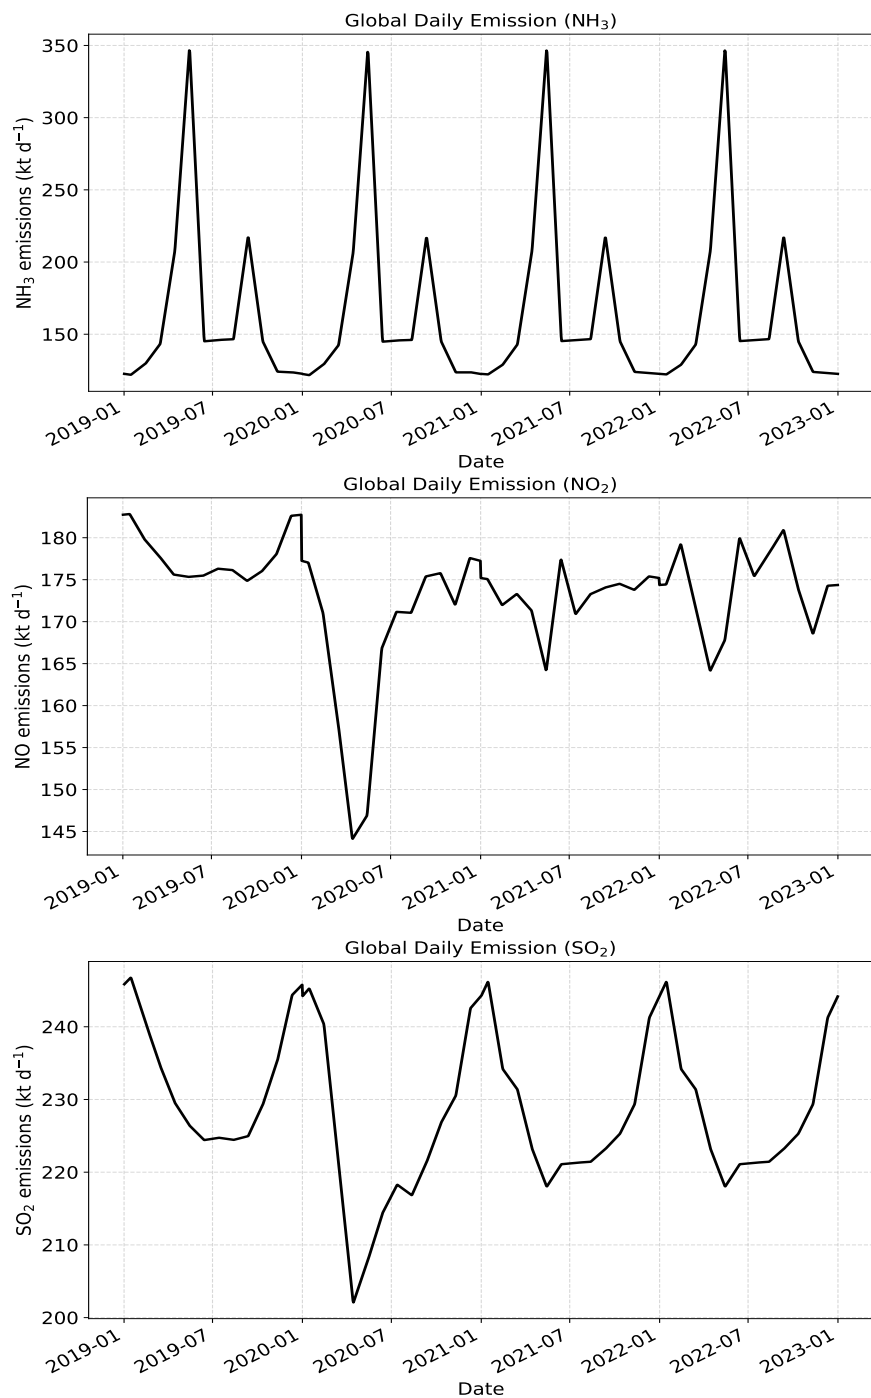

**Figure S1.** Global daily emissions (2019-2022) of (a) NH<sub>3</sub>, (b) NO<sub>x</sub> (as NO), and (c) SO<sub>2</sub> from the prior CEDS anthropogenic and natural sources over the land.

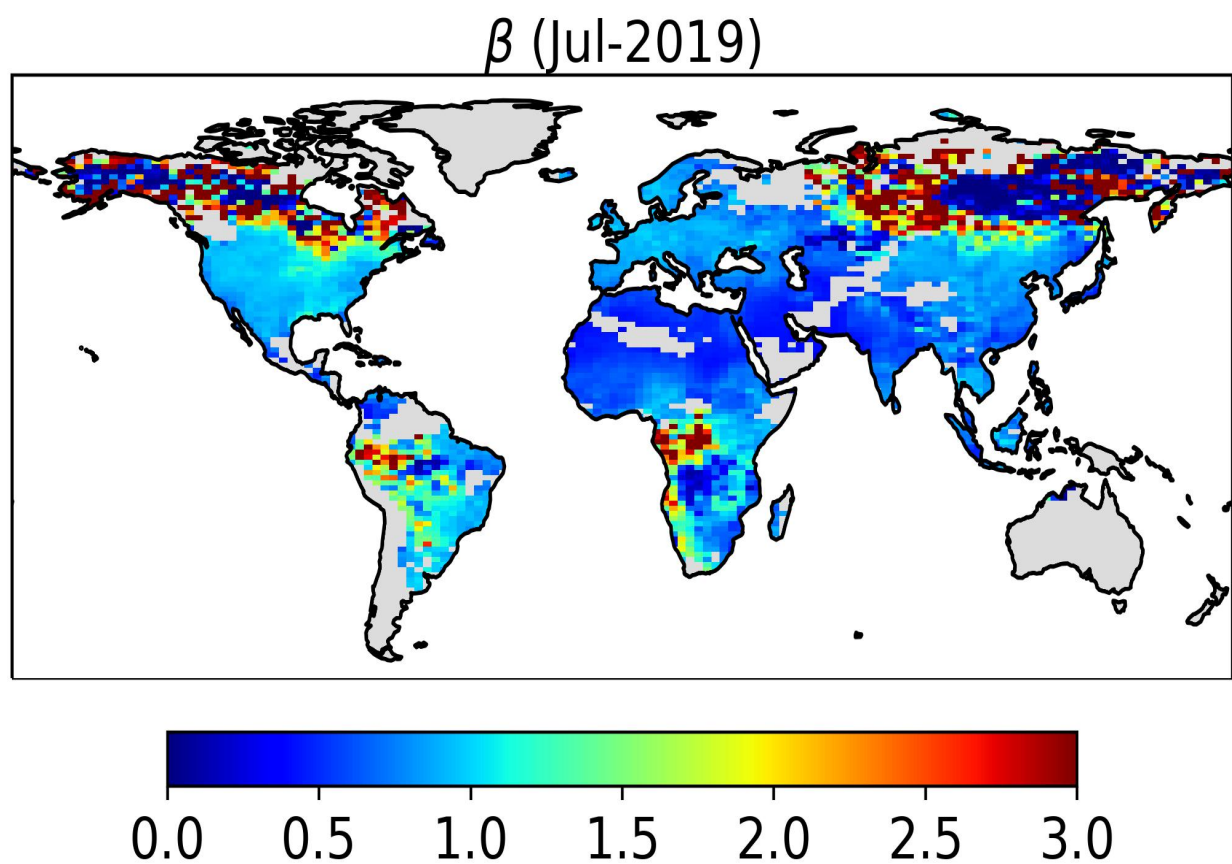

**Figure S2.** Spatial distribution of monthly mean  $\beta$  for July 2019.



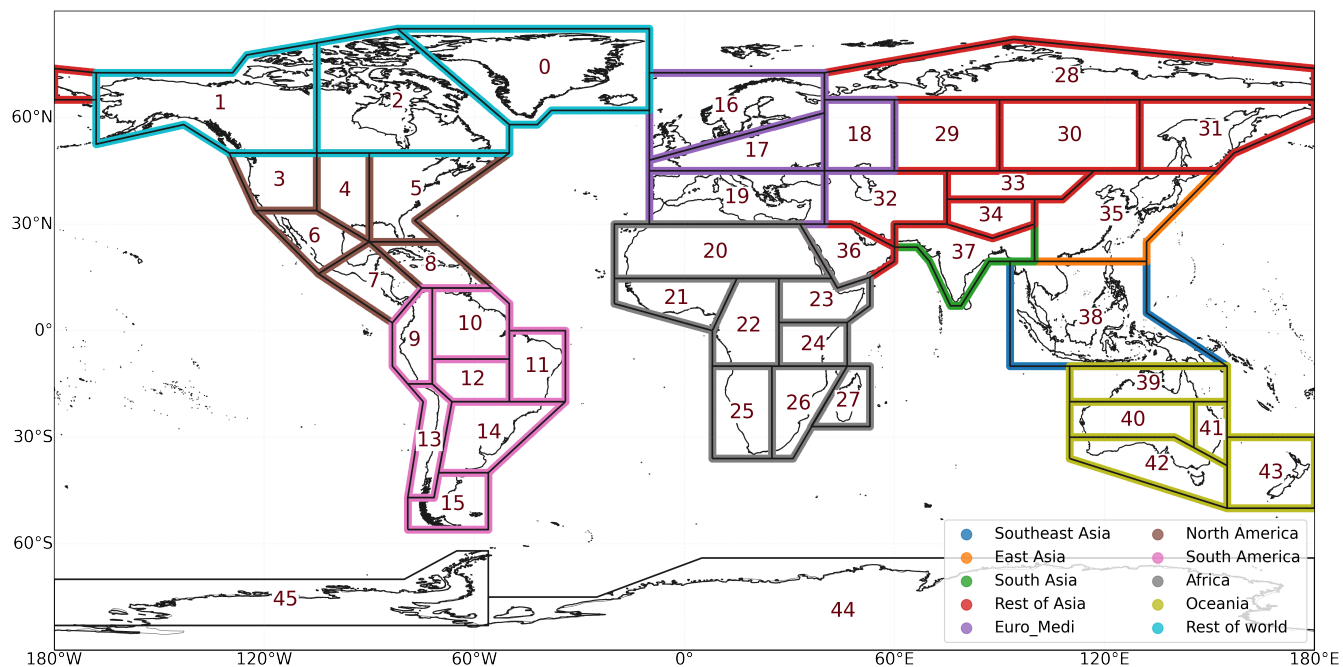

**Figure S3.** The boundaries of the 10 regions over the main land defined by ? (based on the IPCC reference regions described in ? used to gap filling the unconstrained emissions in this study.

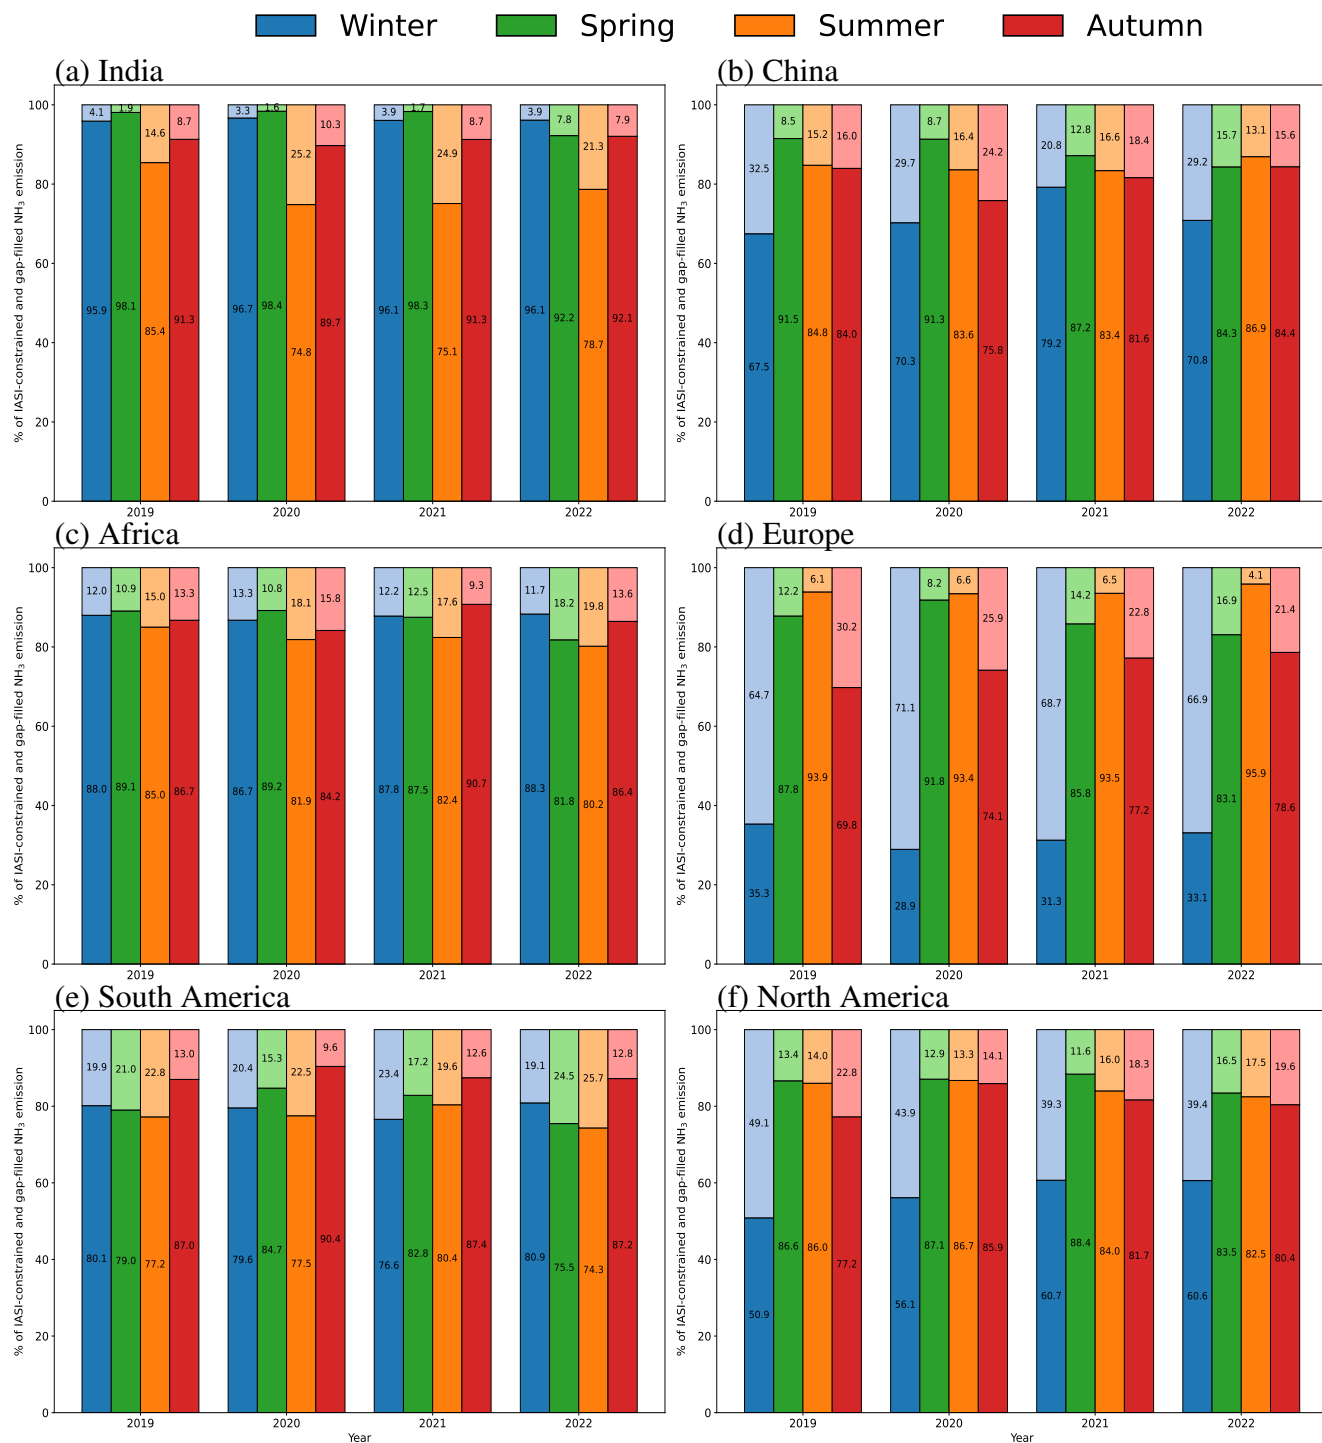

**Figure S4.** IASI-constrained (lower stack bars) and gap-filled (upper stack bars) percentage (%) of seasonal total  $\text{NH}_3$  emissions across six regions over the land from 2019 to 2022.

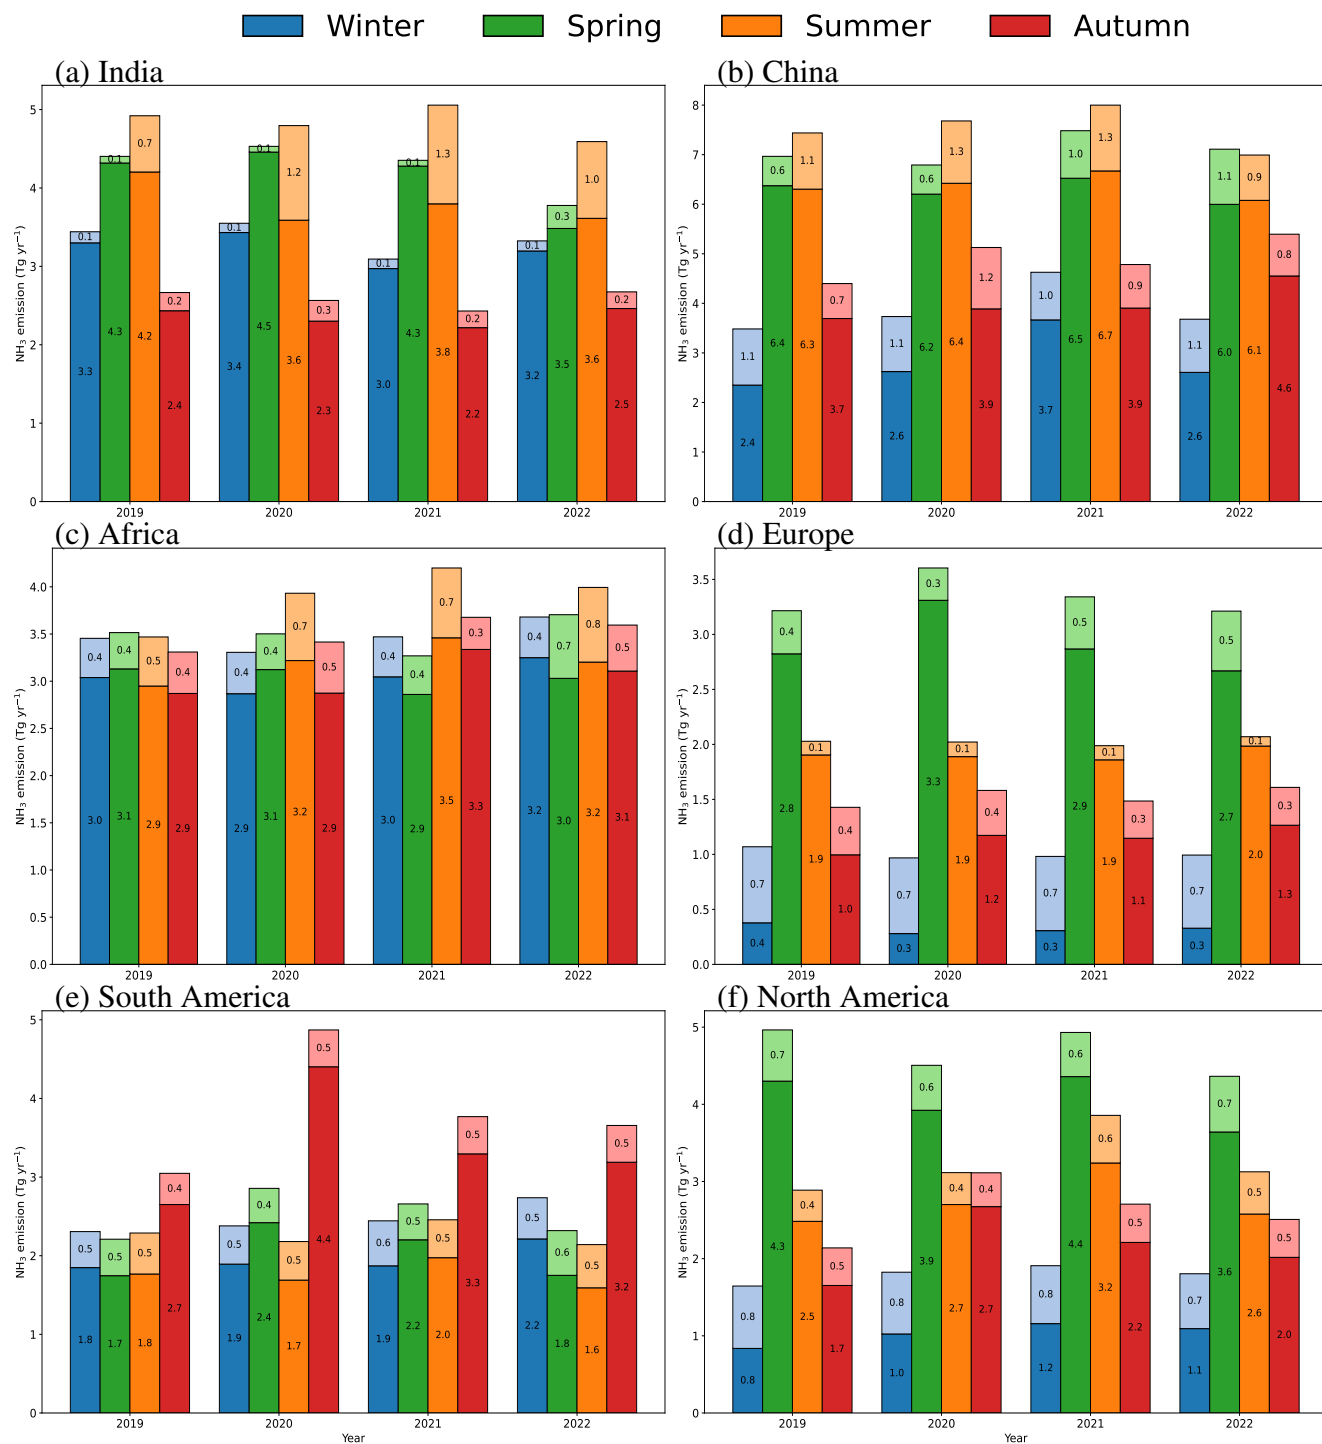

**Figure S5.** Seasonal NH<sub>3</sub> emissions (IASI-constrained (lower stack bars) and gap-filled (upper stack bars)) across six regions over the land from 2019 to 2022.

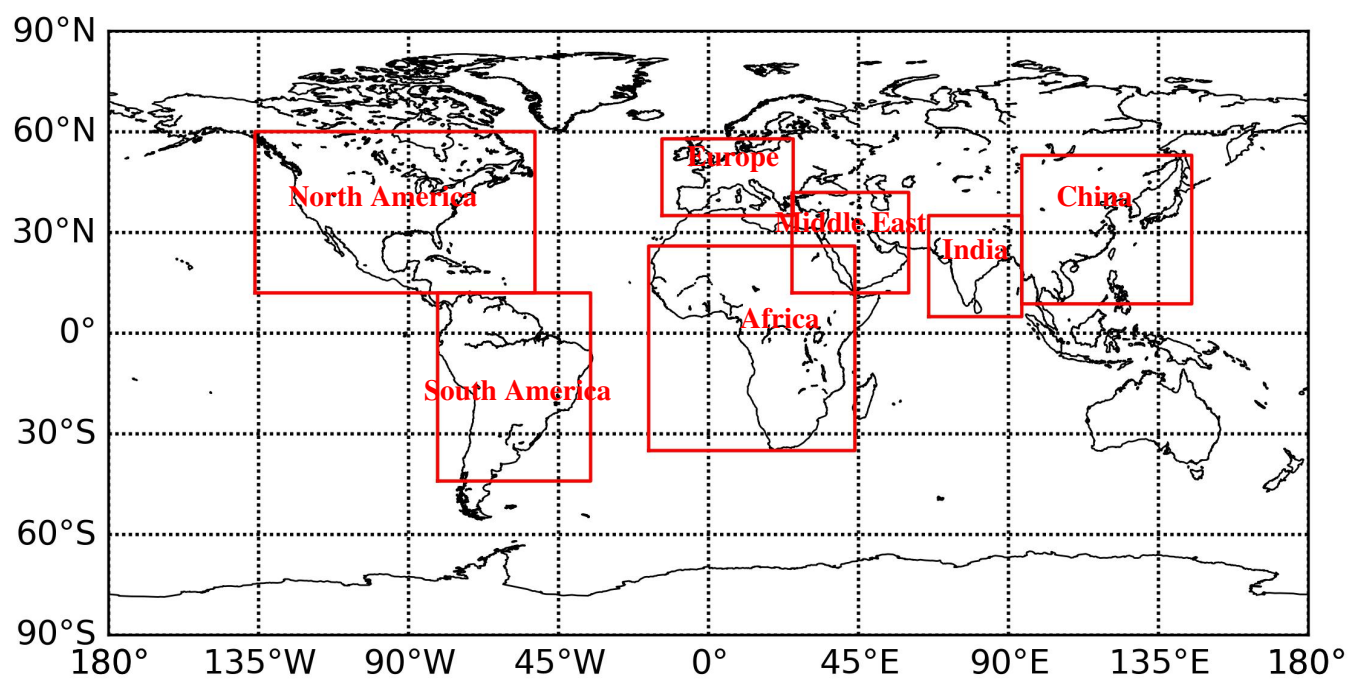

**Figure S6.** The regions selected for the regional analysis.

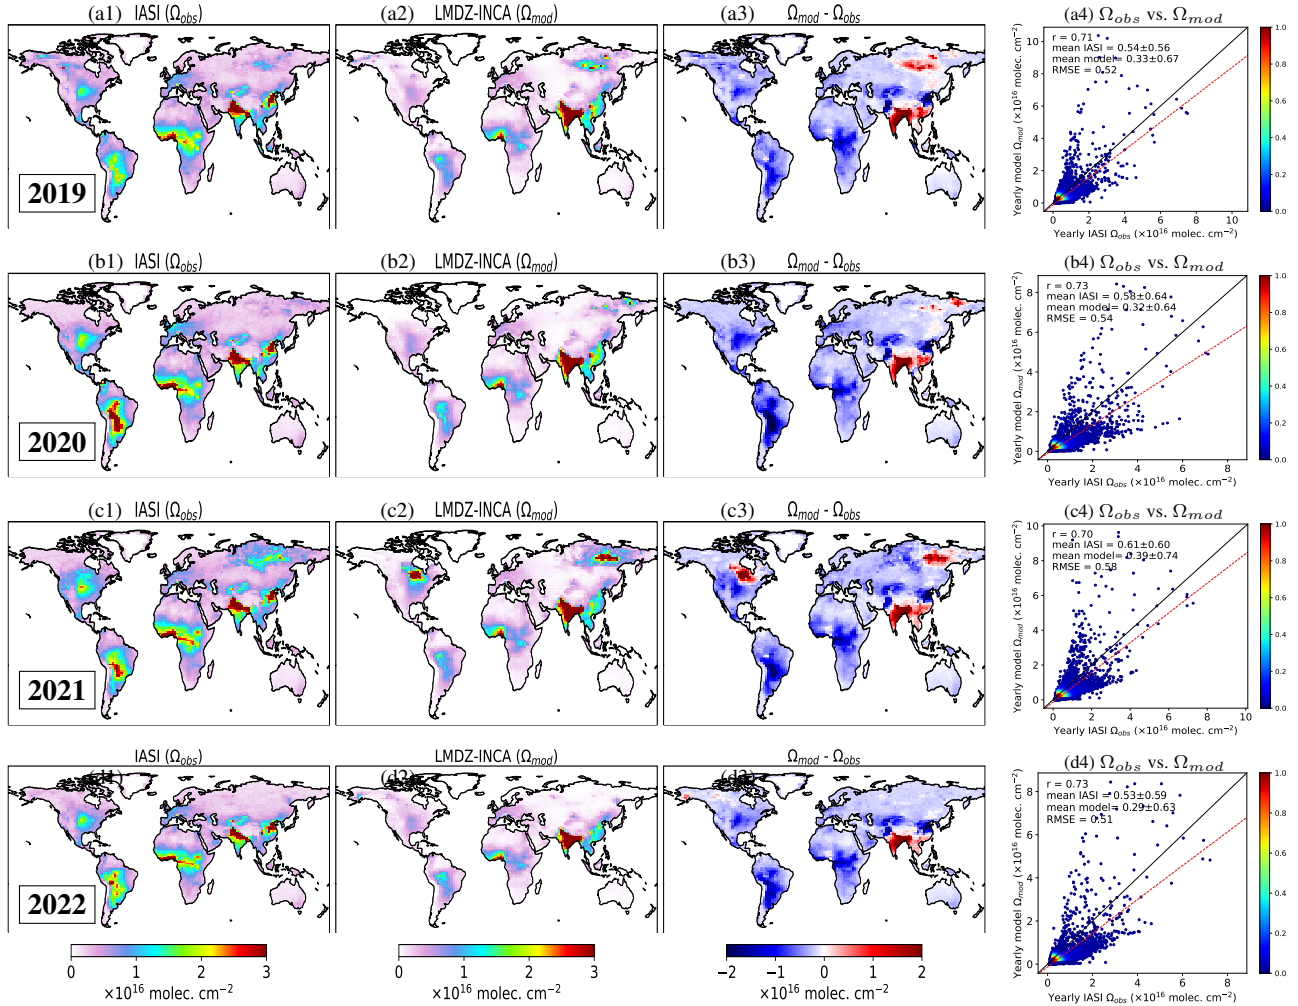

**Figure S7.** The spatial distributions of the annual mean  $\text{NH}_3$  total columns for all four years from 2019 to 2022. The first and second columns in each row show annual mean from IASI ANNI-NH3-v4 observations ( $\Omega_{obs}$ ) and LMDZ-INCA model simulated columns after applying the averaging kernel ( $\Omega_{mod}$ ), respectively. The third column's figures show the differences  $\Omega_{mod} - \Omega_{obs}$  between. The last column figures show the scatter density plots between the observed IASI and the LMDZ-INCA model  $\text{NH}_3$  columns. In the scatter plots, the solid blue line represents the one-to-one line, while the dashed red line represents the regression line.

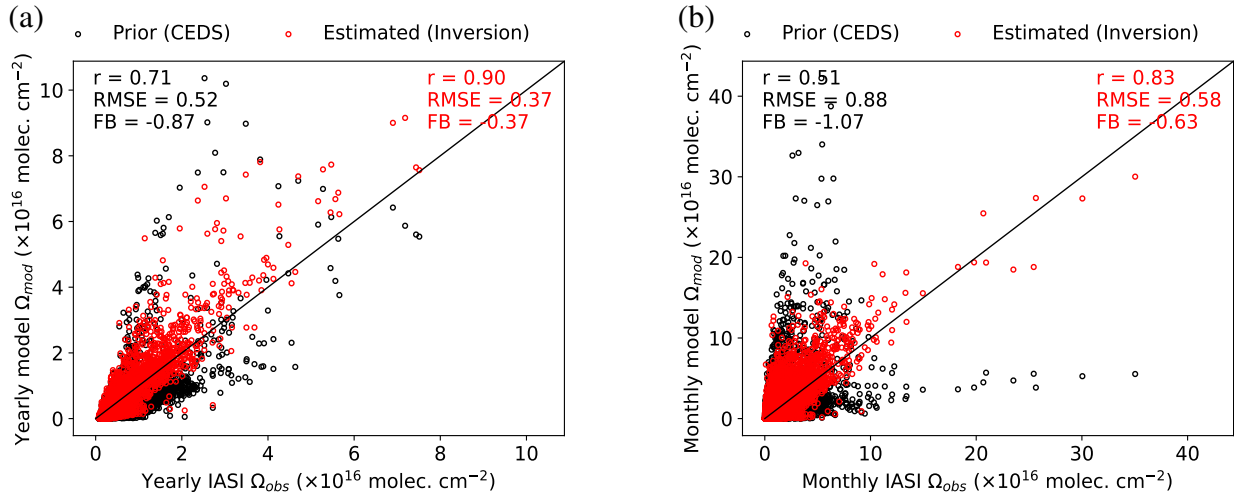

**Figure S8.** Comparison of the (a) annually, and (b) monthly averages of the IASI NH3 column observations ( $\Omega_{obs}$ ) over the model horizontal land grid cells at  $1.27^\circ \times 2.5^\circ$  resolution to the corresponding simulations of average columns with LMDZ-INCA ( $\Omega_{mod}$ ) using the IASI-constrained NH3 emission estimates derived from our global inversions and using the prior CEDS NH3 emissions over the globe and the year 2019. It also shows the correlation coefficient ( $r$ ) and root mean square error (RMSE), and Fractional Bias (FB) from this comparison. The black line denotes the one-to-one line.

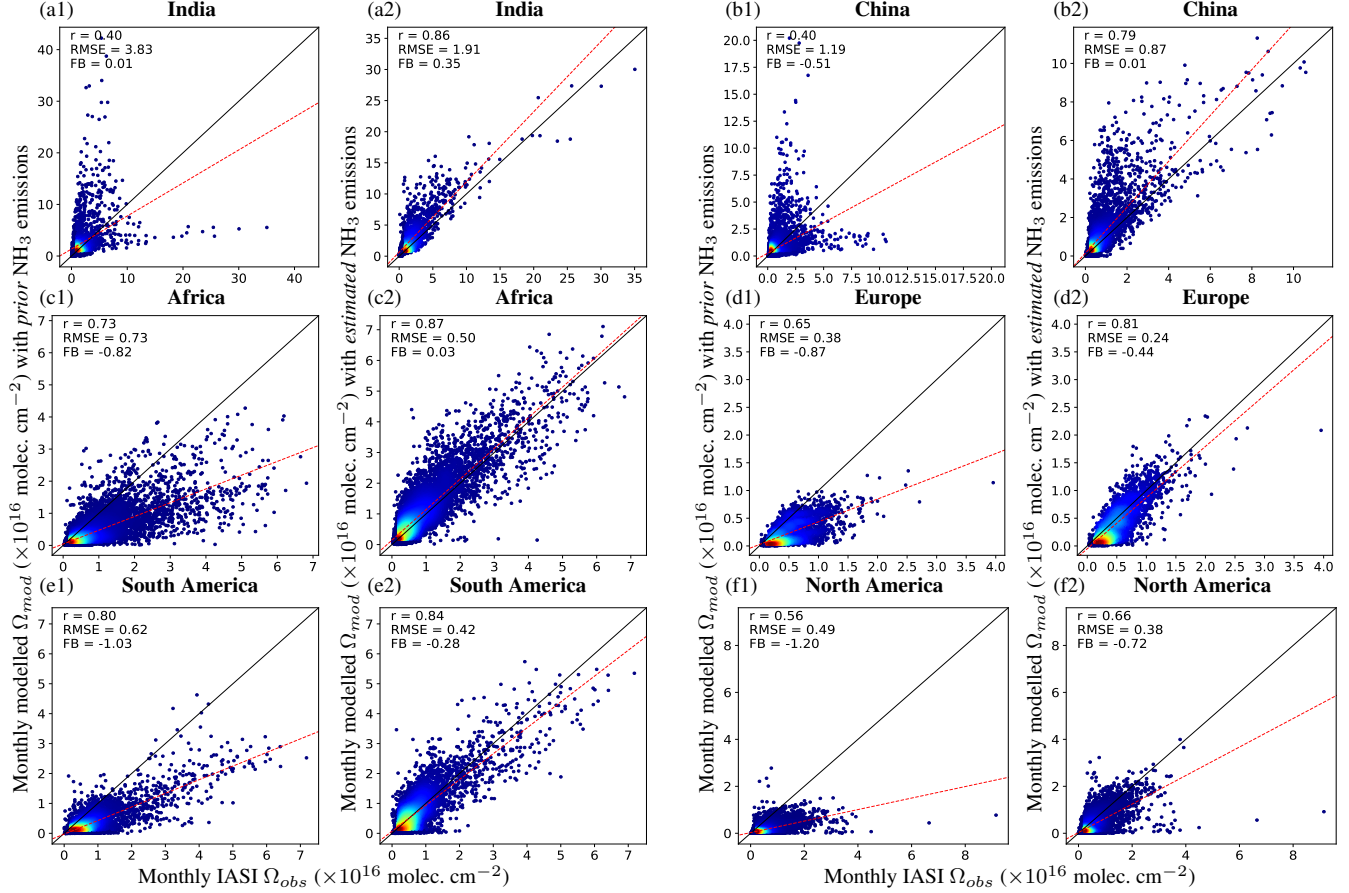

**Figure S9.** Comparison of the monthly averages of the IASI NH<sub>3</sub> total column observations ( $\Omega_{obs}$ ) over the model horizontal land grid cells at  $1.27^\circ \times 2.5^\circ$  resolution to the corresponding averages of the simulation of these observations with LMDZ-INCA model ( $\Omega_{mod}$ ) over different regions for the year 2019. Each panel shows the correlation coefficient ( $r$ ), root mean square error (RMSE), and fractional bias (FB) between modeled (from both prior and IASI-constrained estimated NH<sub>3</sub> emissions from inversions) and observed IASI NH<sub>3</sub> columns. The left column in each panel displays results using prior CEDS NH<sub>3</sub> emissions, while the right column displays results using the estimated NH<sub>3</sub> emissions derived from our global inversions. The red dashed line represents the linear regression fit, and the black line denotes the 1:1 line.

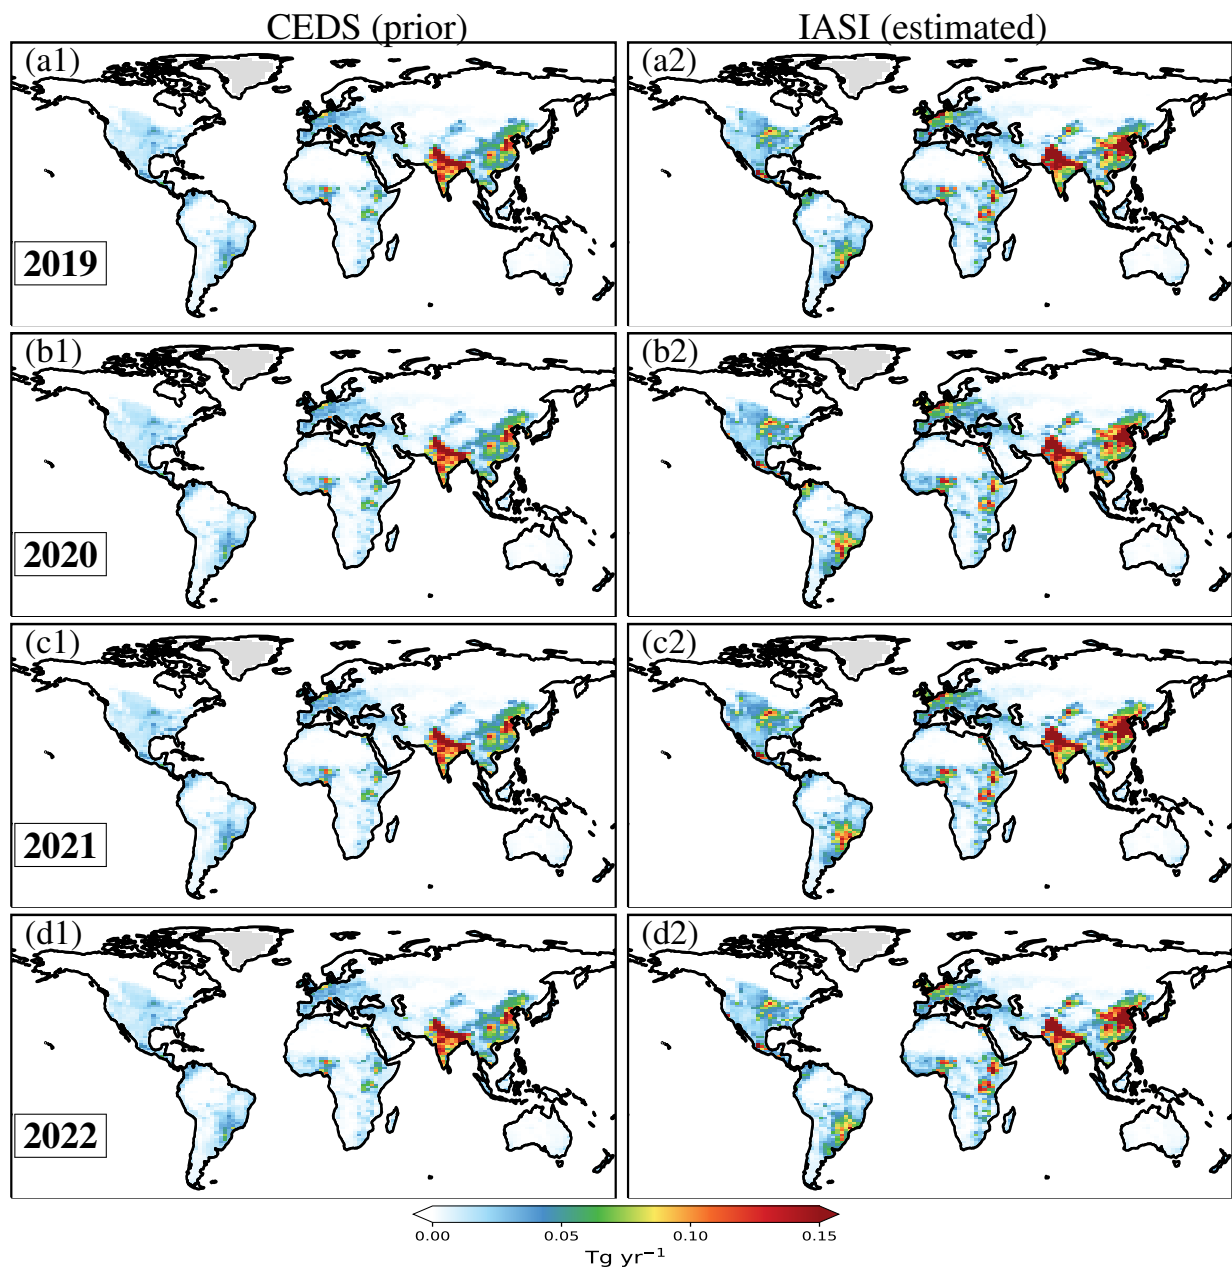

**Figure S10.** Spatial distribution of the total annual  $\text{NH}_3$  emissions for a period of four years from 2019 to 2022, showing the bottom-up prior CEDS emissions (first column), and IASI-constrained emissions (second column).



## South America

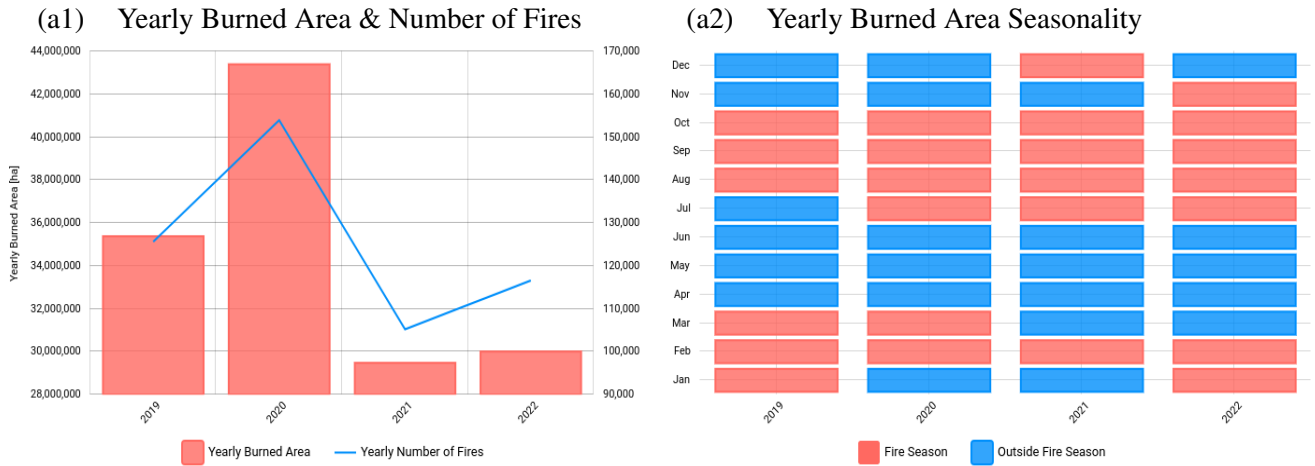

## Africa

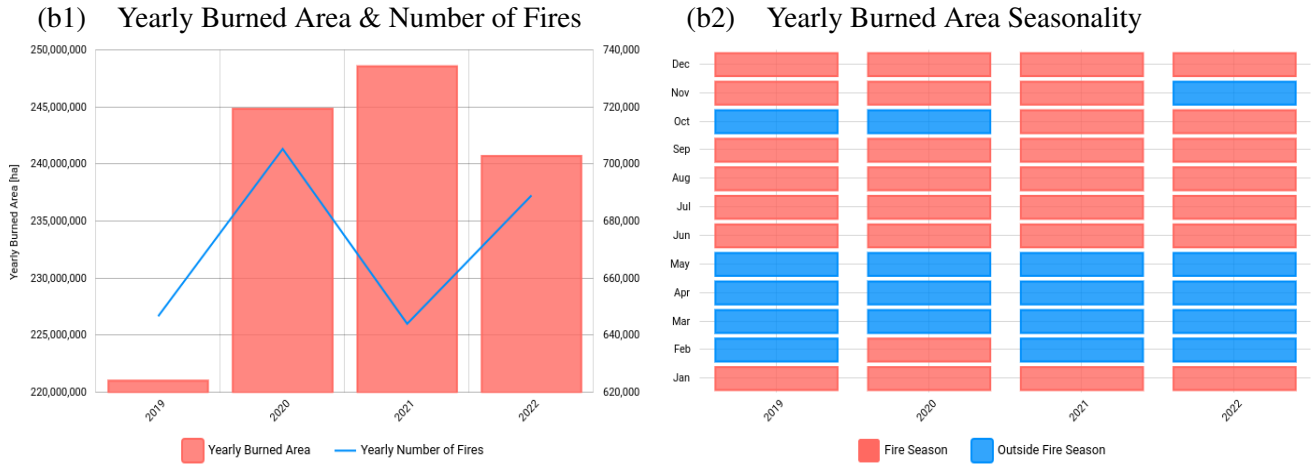

## North America

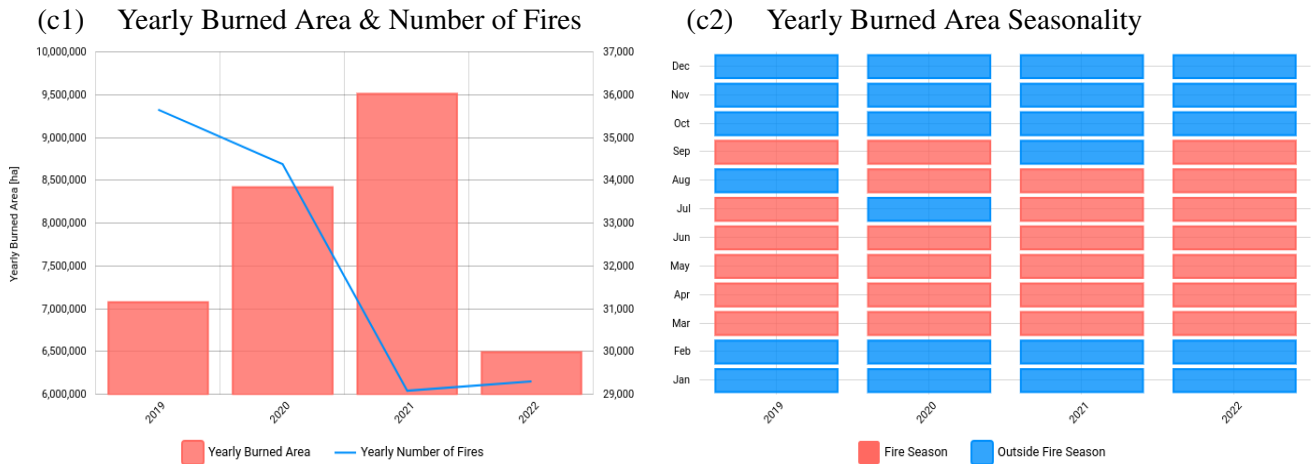

**Figure S11.** Yearly number of fires and burned area across the three regions (a) South America, (b) Africa, and (c) North America for the years from 2019 to 2022 (source: <https://gwis.jrc.ec.europa.eu/>, last access: 02-09-2024).

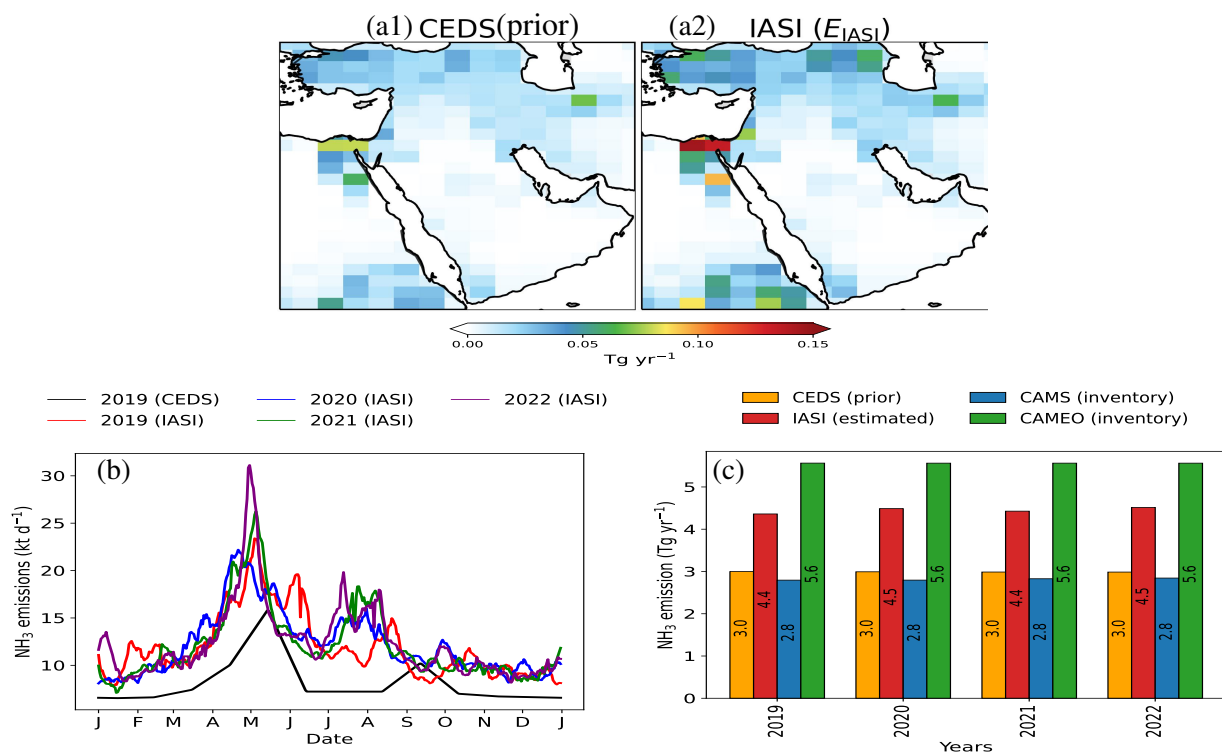

**Figure S12.** NH<sub>3</sub> Emissions over the Middle East region. First row shows the spatial distribution of the total annual emissions averaged over four-year period (2019-2022), showing (a1) the bottom-up prior CEDS emissions (first column), (a2) IASI-constrained emissions ( $E_{IASI}$ ). Figure (b) shows the daily variation of the estimate NH<sub>3</sub> emissions for all four years and (c) shows the annual estimated, prior CEDS, and other bottom-up inventories emissions.
